# Supplementary material for: Foraminiferal Distribution in Two Estuarine Intertidal Mudflats of the French Atlantic Coast: Testing the Marine Influence Index
Source: MDPI journal article supplement (doi:10.3390/w14040645), 2022-02-18
Supplement: s1 [file s1]

## Article

# Foraminiferal distribution in two estuarine intertidal mudflats of the French Atlantic coast: testing the Marine Influence Index

Marie P.A. Fouet<sup>\*1</sup>, David Singer<sup>1</sup>, Alexandra Coynel<sup>2</sup>, Swann Hélot<sup>1</sup>, Hélène Howa<sup>1</sup>, Julie Lalande<sup>3</sup>, Aurélia Mouret<sup>1</sup>, Magali Schweizer<sup>1</sup>, Guillaume Tcherkez<sup>3,4</sup>, Frans J. Jorissen<sup>1</sup>

**Citation:** Fouet, M.P.A. ; Singer, D. ; Coynel, A. ; Hélot, S. ; Howa, H. ; Lalande, J. ; Mouret, A. ; Schweizer, M. ; Tcherkez, G. ; Jorissen, F.J. Foraminiferal distribution in two estuarine intertidal mudflats of the French Atlantic coast: testing the Marine Influence Index. *Water* **2022**, *14*, 645. <https://doi.org/10.3390/w14040645>

Academic Editor: Vincent Bouchet

Received: 8 November 2021

Accepted: 10 February 2022

Published: 21 February 2022

**Publisher's Note:** MDPI stays neutral with regard to jurisdictional claims in published maps and institutional affiliations.

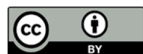

**Copyright:** © 2022 by the authors. Licensee MDPI, Basel, Switzerland. This article is an open access article distributed under the terms and conditions of the Creative Commons Attribution (CC BY) license (<http://creativecommons.org/licenses/by/4.0/>).

- <sup>1</sup> UMR CNRS 6112 LPG-BIAF, Laboratory of Planetology and Geosciences, Angers University, 2 Boulevard Lavoisier, 49045 Angers cedex, France and Nantes Université
  - <sup>2</sup> University of Bordeaux, UMR CNRS 5805 EPOC, 33615 Pessac, France
  - <sup>3</sup> Angers University, Institut de recherche en horticulture et semences (IRHS), INRAE Angers, SFR Quasav, 42 Rue Georges Morel, 49070 Beaucouzé, France
  - <sup>4</sup> Research School of Biology, ANU College of Sciences, Australian National University, 2601 Canberra ACT, Australia
- \* Corresponding author: [marie.fouet@univ-angers.fr](mailto:marie.fouet@univ-angers.fr)

**Abstract:** This study focuses on the foraminiferal distribution on intertidal mudflats of two contrasted estuaries (Auray and Vie) along the French Atlantic coast. In both estuaries the foraminiferal communities are dominated by *Haynesina germanica* and the *Ammonia tepida* group. Stations located near the outlets show a high diversity and abundance of species of the genus *Elphidium*. Stations in the inner estuary show a higher proportion of agglutinated species (*Ammotium salsum*, *Ammobaculites agglutinans*). Multivariate statistical analysis suggests that the distance to the sea, and the percentage of fine sediment ( $< 63\mu\text{m}$ ) are the two main parameters explaining the foraminiferal distribution. Chemical analyses of the sediment show that the two studied estuaries are not affected by major anthropogenic pollution, so that the faunas should mainly reflect the natural controlling parameters. Three indices of environmental quality commonly used in coastal areas show counter-intuitive differences between stations, suggesting that these indices may be less reliable for intertidal estuarine mudflats. The newly developed Marine Influence Index (MII) integrates three major ecological factors: the position of the sampling point on the salinity gradient, the emergence time at low tide and the relative importance of fresh water discharge. In our dataset, MII shows significant correlations with the controlling environmental parameters (distance to the sea, percentage grains  $< 63\mu\text{m}$ ), as well as with the foraminiferal patterns (PCA axis 1, species richness, percentage of *Elphidium* spp. and *Quinqueloculina* spp.). These results suggest that the MII explains a substantial part of the faunal variability on estuarine intertidal mudflats, and can be used to detect deviations from the natural distribution patterns in response to anthropogenic pollution.

**Keywords:** Estuary; biomonitoring; foraminifera; environmental parameters

## Supplementary material

Table S1. Overall characterisation of the Auray and Vie estuaries.

|                                                            | Auray                                | Vie                                                                              |
|------------------------------------------------------------|--------------------------------------|----------------------------------------------------------------------------------|
| Estuary type                                               | Ria                                  | Lowland estuary                                                                  |
| Limit of tidal influence and saltwater intrusion           | 19.8 km                              | 8 km (estimated 16.8 km before the construction of a dam at 8 km from the mouth) |
| Width at the mouth                                         | 950m                                 | 200m                                                                             |
| Catchment area                                             | 324km <sup>2</sup>                   | 84km <sup>2</sup>                                                                |
| Average water flow per year (last 49 years) (Banque HYDRO) | 4.53 m <sup>3</sup> .s <sup>-1</sup> | 1.17 m <sup>3</sup> .s <sup>-1</sup>                                             |
| Average yearly rainfall                                    | 951mm                                | 901mm                                                                            |
| Overall Ecological status (2019 MFD)                       | Average                              | Good                                                                             |

Table S2. Description of the sampling stations in Auray and Vie estuaries.

| Auray estuary |                                                      |          |                                                            |               |
|---------------|------------------------------------------------------|----------|------------------------------------------------------------|---------------|
| Site n°       | Station n°                                           | Altitude | Localisation within the estuary                            |               |
| Site 1        | Station 1A: Upper mudflat, near the slipway          | 2.52m    | Outer estuary                                              |               |
|               | Station 1B : Center of the mudflat, near the slipway | 1.29m    |                                                            |               |
|               | Station 1C : Lower mudflat, near the main channel    | 1.38m    |                                                            |               |
| Site 2        | Station 2A: Upper mudflat                            | 4.50m    | Large middle estuarine mudflat, near oyster farming areas. |               |
|               | Station 2B : Center of the mudflat                   | 4.20m    |                                                            |               |
|               | Station 2C : Lower mudflat                           | 1.38m    |                                                            |               |
| Site 4        | Station 4A: Upper mudflat                            | 3.30m    | Large middle estuarine mudflat                             |               |
|               | Station 4B : Lower mudflat                           | 1.37m    |                                                            |               |
| Site 5        | Station 5A: Upper mudflat                            | 2.20m    |                                                            |               |
|               | Station 5B: Lower mudflat                            | 1.21m    |                                                            |               |
| Site 6        | Station 6A: Upper mudflat                            | 2.50m    |                                                            |               |
|               | Station 6B: Lower mudflat                            | 1.49m    |                                                            |               |
| Site 7        | Mudflat along small auxiliary creak                  | 1.31m    |                                                            |               |
| Site 8        | Mudflat in the city of Auray                         | 2.30m    |                                                            | Inner estuary |
|               | Station 8A: Upper mudflat                            |          |                                                            |               |
|               | Station 8B: Lower mudflat                            | 1.29m    |                                                            |               |
| Vie estuary   |                                                      |          |                                                            |               |
| Site 1        | Beach in the mouth immediately outside the estuary   | -        | Outside the estuary                                        |               |
| Site 2        | Beach just before the entrance of the estuary        | 3.35m    | Outer estuary, urban area                                  |               |
| Site 3        | Dock for ferry boat                                  | 2.00m    |                                                            |               |
| Site 4        | Slipway for pleasure ships                           | 1.82m    |                                                            |               |
| Site 5        | Slipway in fishing harbour                           | 2.67m    |                                                            |               |
| Site 6        | Dock for touristic boat                              | 1.44m    |                                                            |               |
| Site 7        | Large intertidal mudflat                             | 4.82m    | Middle estuary                                             |               |
|               | Station 7A : Upper mudflat                           |          |                                                            |               |
|               | Station 7B : Center of the mudflat                   | 4.18m    |                                                            |               |
|               | Station 7C : Lower mudflat, near the main channel    | 1.61m    |                                                            |               |

|         |                                                   |       |               |
|---------|---------------------------------------------------|-------|---------------|
| Site 8  | Station 8A: Upper mudflat                         | 4.21m | Inner estuary |
|         | Station 8B: Lower mudflat, near the main channel  | 1.15m |               |
| Site 9  | Lower mudflat, near main channel                  | 1.22m |               |
| Site 10 | Mudflat 200 m before the sluice                   | 4.86m |               |
|         | Station 10A: Upper mudflat                        |       |               |
|         | Station 10B: Lower mudflat, near the main channel | 2.24m |               |

Table S3. Grain size data.

| Station | Population 1     |              | Population 2  |              | Population 3                   |              | Population 4  |              | % grains<br>< 63 μm | % grains<br>< 8 μm |
|---------|------------------|--------------|---------------|--------------|--------------------------------|--------------|---------------|--------------|---------------------|--------------------|
|         | (very fine silt) |              | (medium silt) |              | (coarse silt - very fine sand) |              | (medium sand) |              |                     |                    |
|         | mode<br>(μm)     | Population % | mode<br>(μm)  | Population % | mode<br>(μm)                   | Population % | mode<br>(μm)  | Population % |                     |                    |
| Auray   |                  |              |               |              |                                |              |               |              |                     |                    |
| 1A      | 5.8              | 42.4         | 17.6          | 14.8         | 64.1                           | 40.2         | 224.4         | 2.6          | 76.6                | 27.8               |
| 1B      | 6.1              | 40.0         | 19.2          | 9.1          | 86.3                           | 50.9         | 256.2         | 0.1          | 66.9                | 24.6               |
| 1C      | 5.8              | 27.3         | 18.3          | 7.3          | 104.2                          | 60.2         | 492.6         | 5.2          | 49.4                | 17.2               |
| 2A      | 5.6              | 47.2         | 16.3          | 14.2         | 48.9                           | 36.0         | 187.0         | 2.6          | 83.0                | 32.0               |
| 2B      | 5.6              | 49.6         | 16.2          | 12.5         | 41.7                           | 29.9         | 115.9         | 7.9          | 85.5                | 33.1               |
| 2C      | 6.0              | 49.5         | 20.3          | 26.4         | 66.2                           | 21.5         | 252.7         | 2.7          | 83.4                | 33.1               |
| 4A      | 5.4              | 36.0         | 16.9          | 12.2         | 79.1                           | 48.6         | 332.0         | 3.1          | 67.0                | 25.5               |
| 4B      | 5.2              | 39.5         | 16.9          | 11.0         | 80.7                           | 46.6         | 353.0         | 2.9          | 68.3                | 28.1               |
| 5A      | 5.1              | 47.5         | 15.3          | 22.3         | 58.8                           | 27.7         | 196.2         | 2.5          | 83.9                | 36.9               |
| 5B      | 5.2              | 46.8         | 15.7          | 11.7         | 53.0                           | 39.4         | 254.0         | 2.1          | 80.4                | 34.4               |
| 6A      | 5.3              | 46.2         | 16.1          | 11.7         | 60.1                           | 39.1         | 213.8         | 3.0          | 77.2                | 32.8               |
| 6B      | 5.0              | 47.0         | 16.9          | 21.1         | 78.5                           | 29.2         | 270.3         | 2.7          | 79.0                | 35.6               |
| 7       | 5.0              | 46.7         | 12.7          | 10.7         | 30.1                           | 30.9         | 118.1         | 11.6         | 84.7                | 36.3               |
| 8A      | 4.6              | 36.7         | 14.1          | 25.4         | 65.1                           | 35.5         | 265.8         | 2.4          | 78.5                | 33.9               |
| 8B      | 4.9              | 32.0         | 19.7          | 23.1         | 92.9                           | 14.3         | 284.2         | 30.7         | 54.9                | 24.7               |
| Vie     |                  |              |               |              |                                |              |               |              |                     |                    |
| 3       | 7.8              | 59.2         |               |              | 79.3                           | 37.0         | 296.9         | 3.7          | 72.4                | 31.7               |
| 4       | 6.9              | 49.2         |               |              | 82.4                           | 48.2         | 296.8         | 2.6          | 66.0                | 29.0               |
| 5       | 8.4              | 52.6         |               |              | 68.6                           | 45.4         | 276.5         | 2.0          | 72.9                | 27.1               |
| 6       | 7.1              | 51.2         |               |              | 71.5                           | 38.0         | 247.8         | 10.8         | 65.0                | 29.2               |
| 7A      | 7.0              | 53.5         |               |              | 59.3                           | 41.3         | 310.3         | 5.2          | 75.0                | 31.5               |
| 7B      | 6.2              | 58.0         |               |              | 52.1                           | 37.5         | 301.7         | 4.6          | 79.0                | 36.4               |
| 7C      | 6.6              | 57.1         |               |              | 63.6                           | 37.2         | 297.2         | 5.6          | 74.7                | 34.3               |
| 8A      | 6.6              | 56.1         |               |              | 58.9                           | 39.7         | 283.2         | 4.2          | 76.3                | 34.2               |
| 8B      | 7.3              | 52.0         |               |              | 100.8                          | 47.5         | 321.1         | 0.5          | 63.8                | 27.8               |
| 9       | 7.3              | 57.9         |               |              | 98.1                           | 40.2         | 274.6         | 1.9          | 70.2                | 31.5               |
| 10A     | 6.0              | 61.1         |               |              | 64.8                           | 38.3         | 202.9         | 0.6          | 79.4                | 38.2               |
| 10B     | 6.2              | 66.1         |               |              | 42.2                           | 31.4         | 224.2         | 0.9          | 88.5                | 43.1               |

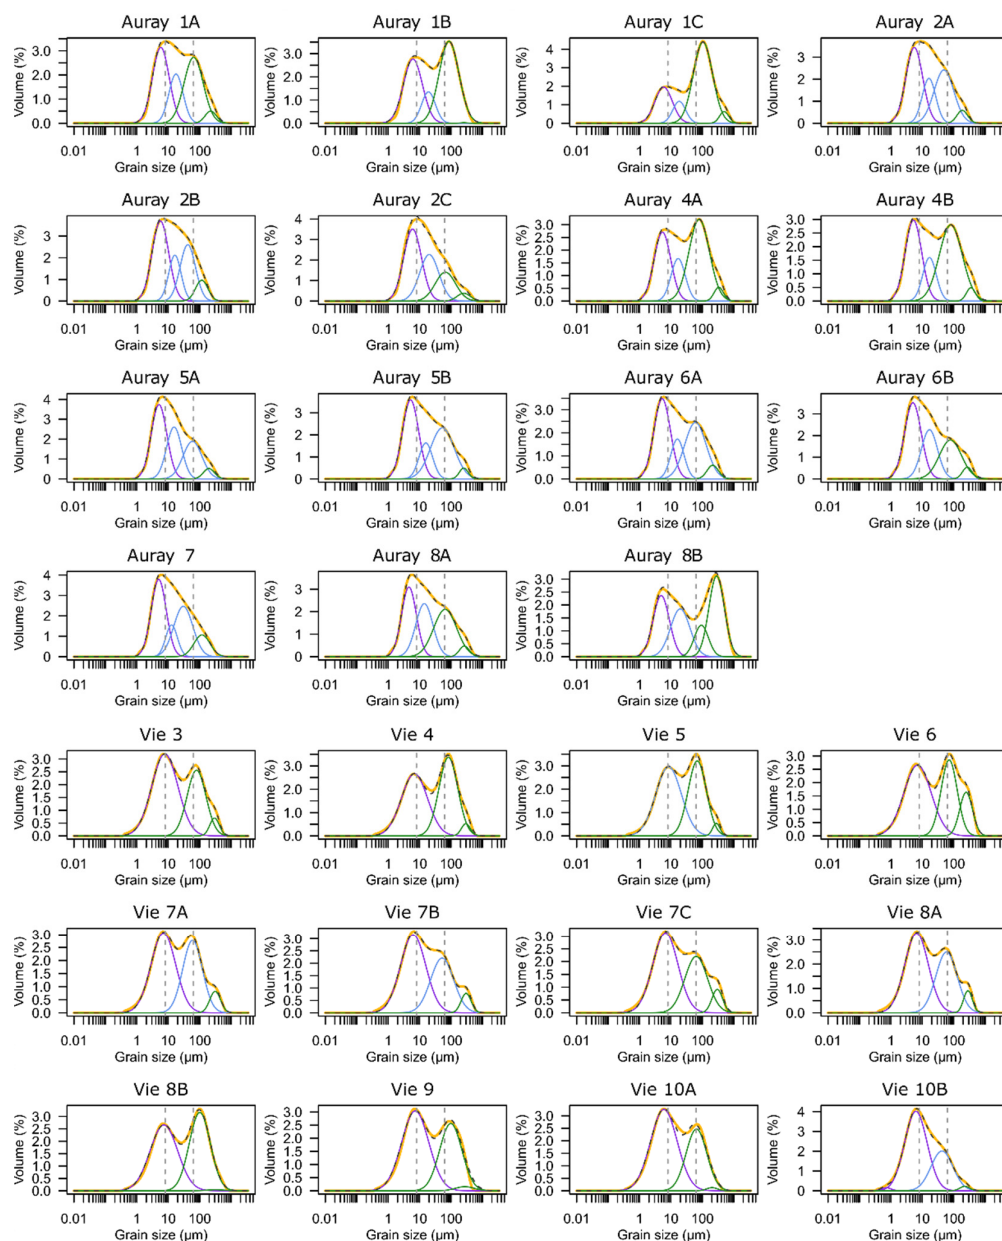

**Figure S1.** Overall grainsize distribution (yellow dashes curves), and reconstructed grain size populations (solid coloured curves).

**Table S4.** Measured values of metallic trace elements (in mg/kg of dry sediment).

|       |    | V    | Cr   | Co  | Ni   | Cu   | Zn  | As   | Sr  | Mo  | Ag  | Cd  | Sn  | Sb  | Ba  | Pb   | Th  | U   | % grains<br>< 63 μm |
|-------|----|------|------|-----|------|------|-----|------|-----|-----|-----|-----|-----|-----|-----|------|-----|-----|---------------------|
| Auray | 1A | 97.7 | 76.4 | 9.0 | 28.0 | 61.5 | 168 | 16.2 | 121 | 2.0 | 0.3 | 0.6 | 6.3 | 1.0 | 341 | 41.8 | 7.7 | 3.0 | 76.6                |
|       | 1B | 82.5 | 63.9 | 7.8 | 23.4 | 16.2 | 123 | 11.4 | 146 | 2.0 | 0.2 | 0.5 | 5.2 | 0.9 | 412 | 35.9 | 5.8 | 2.7 | 66.9                |
|       | 1C | 77.1 | 59.0 | 7.4 | 21.8 | 13.4 | 107 | 11.1 | 159 | 3.0 | 0.2 | 0.4 | 4.8 | 0.9 | 369 | 32.4 | 5.5 | 2.8 | 49.4                |
|       | 2A | 104  | 81.8 | 9.1 | 30.3 | 23.1 | 154 | 17.1 | 123 | 2.7 | 0.3 | 0.6 | 6.5 | 1.0 | 295 | 43.4 | 9.4 | 3.3 | 83.0                |
|       | 2B | 98.7 | 77.0 | 8.6 | 28.5 | 20.2 | 139 | 15.8 | 137 | 2.9 | 0.3 | 0.5 | 6.1 | 1.0 | 287 | 41.5 | 8.8 | 3.5 | 85.5                |
|       | 2C | 89.9 | 71.8 | 8.0 | 26.2 | 18.6 | 125 | 16.4 | 125 | 2.2 | 0.3 | 0.5 | 5.7 | 0.9 | 289 | 37.4 | 7.9 | 3.0 | 83.4                |
|       | 4A | 86.3 | 66.0 | 7.9 | 24.5 | 14.6 | 108 | 13.3 | 142 | 4.4 | 0.2 | 0.4 | 5.2 | 0.9 | 358 | 35.0 | 6.7 | 3.3 | 67.0                |
|       | 4B | 97.9 | 75.5 | 8.9 | 28.1 | 22.6 | 146 | 14.6 | 122 | 2.7 | 0.3 | 0.5 | 6.1 | 1.0 | 334 | 41.6 | 8.2 | 3.4 | 68.3                |

|                   |     |       |      |      |      |      |     |      |     |      |     |     |     |     |     |      |      |      |      |
|-------------------|-----|-------|------|------|------|------|-----|------|-----|------|-----|-----|-----|-----|-----|------|------|------|------|
| Vie               | 5A  | 98.3  | 79.2 | 9.1  | 29.2 | 25.7 | 173 | 18.0 | 161 | 1.5  | 0.4 | 0.6 | 7.1 | 1.0 | 297 | 44.4 | 8.7  | 3.0  | 83.9 |
|                   | 5B  | 103   | 82.5 | 9.5  | 30.7 | 24.7 | 170 | 18.0 | 133 | 1.2  | 0.4 | 0.6 | 7.2 | 1.0 | 308 | 46.0 | 9.2  | 2.9  | 80.4 |
|                   | 6A  | 87.7  | 71.4 | 8.4  | 26.2 | 21.8 | 160 | 17.8 | 137 | 1.4  | 0.4 | 0.6 | 6.2 | 1.0 | 313 | 42.6 | 7.5  | 2.9  | 77.2 |
|                   | 6B  | 89.7  | 72.6 | 8.6  | 27.5 | 23.3 | 162 | 18.2 | 118 | 1.3  | 0.4 | 0.6 | 6.2 | 0.9 | 277 | 42.8 | 8.1  | 2.8  | 79.0 |
|                   | 7   | 106   | 87.0 | 10.1 | 33.4 | 30.4 | 196 | 21.1 | 120 | 1.2  | 0.5 | 0.7 | 7.5 | 1.1 | 294 | 50.7 | 9.9  | 3.3  | 84.7 |
|                   | 8A  | 85.9  | 71.1 | 8.4  | 27.8 | 25.5 | 173 | 19.2 | 103 | 1.6  | 0.4 | 0.6 | 6.3 | 0.9 | 272 | 42.5 | 7.9  | 3.0  | 78.5 |
|                   | 8B  | 48.9  | 40.3 | 5.5  | 15.9 | 12.7 | 126 | 12.2 | 139 | 0.6  | 0.3 | 0.4 | 4.6 | 0.7 | 470 | 35.2 | 4.2  | 1.9  | 54.9 |
|                   | 1   | 33.3  | 18.1 | 4.0  | 12.0 | 9.4  | 40  | 8.4  | 501 | 0.3  | 0.2 | 0.1 | 1.6 | 1.2 | 293 | 10.8 | 2.6  | 1.1  | 4.7  |
|                   | 2   | 22.1  | 11.6 | 3.0  | 7.9  | 5.0  | 27  | 7.4  | 419 | 0.9  | 0.1 | 0.1 | 1.0 | 0.8 | 241 | 12.7 | 1.9  | 0.8  | 4.1  |
|                   | 3   | 70.7  | 51.7 | 8.3  | 22.3 | 17.8 | 104 | 15.5 | 463 | 0.8  | 0.4 | 0.3 | 3.8 | 1.0 | 213 | 28.7 | 5.9  | 1.7  | 72.4 |
|                   | 4   | 73.4  | 52.5 | 8.9  | 22.6 | 26.5 | 128 | 16.7 | 446 | 2.4  | 0.4 | 0.3 | 4.0 | 1.0 | 218 | 30.0 | 6.2  | 1.7  | 66.0 |
|                   | 5   | 82.2  | 60.3 | 9.8  | 24.9 | 31.4 | 138 | 19.3 | 369 | 0.9  | 0.4 | 0.3 | 4.7 | 1.2 | 245 | 33.9 | 6.9  | 1.9  | 72.9 |
|                   | 6   | 84.4  | 62.8 | 10.6 | 28.5 | 51.3 | 195 | 16.4 | 376 | 1.3  | 0.4 | 0.4 | 5.8 | 1.3 | 287 | 39.2 | 7.5  | 2.2  | 65.0 |
|                   | 7A  | 81.7  | 63.9 | 10.2 | 25.1 | 19.3 | 127 | 14.5 | 324 | 2.5  | 0.5 | 0.3 | 4.8 | 1.2 | 268 | 35.9 | 7.3  | 2.3  | 75.0 |
|                   | 7B  | 94.8  | 68.6 | 12.6 | 27.1 | 22.2 | 130 | 16.6 | 306 | 1.0  | 0.5 | 0.4 | 4.9 | 1.3 | 266 | 36.1 | 7.5  | 2.2  | 79.0 |
|                   | 7C  | 79.9  | 59.8 | 10.0 | 24.7 | 20.8 | 122 | 17.5 | 412 | 1.0  | 0.4 | 0.4 | 4.7 | 1.2 | 266 | 34.8 | 7.1  | 2.0  | 74.7 |
|                   | 8A  | 69.0  | 53.0 | 9.3  | 21.3 | 20.2 | 114 | 15.6 | 321 | 1.6  | 0.4 | 0.3 | 4.0 | 1.1 | 280 | 31.1 | 6.4  | 2.0  | 76.3 |
|                   | 8B  | 81.9  | 64.5 | 10.2 | 24.7 | 22.9 | 129 | 17.8 | 251 | 1.4  | 0.5 | 0.4 | 5.5 | 1.3 | 307 | 34.4 | 7.2  | 2.2  | 63.8 |
|                   | 9   | 64.1  | 50.6 | 9.1  | 23.7 | 19.6 | 108 | 14.9 | 247 | 0.7  | 0.9 | 0.3 | 3.8 | 1.1 | 293 | 30.1 | 6.1  | 1.8  | 70.2 |
|                   | 10A | 102.3 | 80.1 | 12.3 | 30.7 | 30.5 | 162 | 24.0 | 234 | 1.0  | 0.5 | 0.4 | 6.1 | 1.5 | 314 | 39.8 | 9.3  | 2.3  | 79.4 |
|                   | 10B | 76.7  | 62.1 | 9.5  | 22.8 | 20.9 | 121 | 13.2 | 175 | 0.9  | 0.4 | 0.3 | 4.5 | 1.2 | 332 | 32.9 | 7.2  | 2.3  | 88.5 |
| Reference VIVAN 8 |     | 119.5 | 81.9 | 14.2 | 43.9 | 18.8 | 135 | 23.4 | 163 | 30.2 | 0.5 | 0.9 | 4.5 | 1.5 | 310 | 36.7 | 10.3 | 13.4 |      |

Table S5. %C<sub>org</sub> and  $\delta^{13}\text{C}$  values in decarbonated samples from Auray and Vie estuaries.

| Auray   |                         |                              | Vie     |                         |                              |
|---------|-------------------------|------------------------------|---------|-------------------------|------------------------------|
| Station | C <sub>org</sub><br>(%) | $\delta^{13}\text{C}$<br>(‰) | Station | C <sub>org</sub><br>(%) | $\delta^{13}\text{C}$<br>(‰) |
| 1A      | 1.66                    | -18.77                       | 3       | 2.27                    | -14.31                       |
| 1B      | 1.43                    | -18.27                       | 4       | 2.08                    | -15.54                       |
| 1C      | 1.53                    | -17.71                       | 5       | 2.15                    | -17.41                       |
| 2A      | 2.27                    | -18.87                       | 6       | 1.96                    | -17.73                       |
| 2B      | 1.88                    | -18.84                       | 7A      | 1.34                    | -19.11                       |
| 2C      | 2.33                    | -18.04                       | 7B      | 1.56                    | -21.00                       |
| 4A      | 1.56                    | -18.69                       | 7C      | 1.95                    | -14.96                       |
| 4B      | 2.22                    | -19.35                       | 8A      | 1.47                    | -13.58                       |
| 5A      | 2.40                    | -19.93                       | 8B      | 1.96                    | -23.20                       |
| 5B      | 2.28                    | -21.08                       | 9       | 1.51                    | -22.77                       |
| 6A      | 2.15                    | -21.13                       | 10A     | 1.72                    | -24.88                       |
| 6B      | 2.17                    | -21.32                       | 10B     | 1.16                    | -19.82                       |
| 7       | 2.91                    | -21.21                       |         |                         |                              |
| 8A      | 2.93                    | -22.69                       |         |                         |                              |
| 8B      | 1.23                    | -23.86                       |         |                         |                              |

**Table S6.** Auray estuary. Foraminiferal density standardised for 50 cm<sup>3</sup>. For all stations. Data are presented for the three replicates.

| Site | Station | Replicate | 0-1 cm total forams / 50 cm <sup>3</sup> | 0-1 cm average / 50 cm <sup>3</sup> | standard deviation | 0-1 cm average / 50 cm <sup>3</sup> | standard deviation |
|------|---------|-----------|------------------------------------------|-------------------------------------|--------------------|-------------------------------------|--------------------|
| 1    | 1A      | A         | 424.4                                    |                                     |                    |                                     |                    |
|      |         | B         | 234.3                                    | 320.9                               | 96.1               | 75.9                                | 11.1               |
|      |         | C         | 304.1                                    |                                     |                    |                                     |                    |
|      | 1B      | A         | 1033.9                                   |                                     |                    |                                     |                    |
|      |         | B         | 424.9                                    | 1081.3                              | 681.3              | 242.2                               | 252.6              |
|      |         | C         | 1785.0                                   |                                     |                    |                                     |                    |
|      | 1C      | A         | 1899.2                                   |                                     |                    |                                     |                    |
|      |         | B         | 1380.6                                   | 1693.2                              | 275.2              | 331.2                               | 181.7              |
|      |         | C         | 1799.7                                   |                                     |                    |                                     |                    |
| 2    | 2A      | A         | 23.5                                     |                                     |                    |                                     |                    |
|      |         | B         | 4.8                                      | 26.5                                | 23.3               | 24.0                                | 11.0               |
|      |         | C         | 51.1                                     |                                     |                    |                                     |                    |
|      | 2B      | A         | 75.3                                     |                                     |                    |                                     |                    |
|      |         | B         | 11.7                                     | 33.9                                | 35.9               | 35.9                                | 35.5               |
|      |         | C         | 14.5                                     |                                     |                    |                                     |                    |
|      | 2C      | A         | 778.9                                    |                                     |                    |                                     |                    |
|      |         | B         | 474.1                                    | 618.8                               | 153.0              | 62.2                                | 76.8               |
|      |         | C         | 603.4                                    |                                     |                    |                                     |                    |
| 4    | 4A      | A         | 700.7                                    |                                     |                    |                                     |                    |
|      |         | B         | 496.9                                    | 655.1                               | 141.0              | 116.3                               | 66.1               |
|      |         | C         | 767.6                                    |                                     |                    |                                     |                    |
|      | 4B      | A         | 427.8                                    |                                     |                    |                                     |                    |
|      |         | B         | 229.5                                    | 309.9                               | 104.4              | 102.0                               | 61.6               |
|      |         | C         | 272.3                                    |                                     |                    |                                     |                    |
| 5    | 5A      | A         | 237.7                                    |                                     |                    |                                     |                    |
|      |         | B         | 305.5                                    | 279.0                               | 36.2               | 9.9                                 | 6.0                |
|      |         | C         | 293.7                                    |                                     |                    |                                     |                    |
|      | 5B      | A         | 339.3                                    |                                     |                    |                                     |                    |
|      |         | B         | 282.0                                    | 310.8                               | 28.7               | 50.0                                | 15.5               |
|      |         | C         | 311.0                                    |                                     |                    |                                     |                    |
| 6    | 6A      | A         | 816.5                                    |                                     |                    |                                     |                    |
|      |         | B         | 829.4                                    | 810.0                               | 23.3               | 14.9                                | 12.9               |
|      |         | C         | 784.2                                    |                                     |                    |                                     |                    |
|      | 6B      | A         | 1067.1                                   |                                     |                    |                                     |                    |
|      |         | B         | 794.8                                    | 901.2                               | 145.6              | 16.2                                | 13.1               |
|      |         | C         | 841.8                                    |                                     |                    |                                     |                    |
| 7    | 7       | A         | 125.8                                    |                                     |                    |                                     |                    |
|      |         | B         | 147.2                                    | 138.7                               | 11.4               | 2.3                                 | 2.0                |
|      |         | C         | 143.1                                    |                                     |                    |                                     |                    |
| 8    | 8A      | A         | 180.4                                    |                                     |                    |                                     |                    |
|      |         | B         | 80.2                                     | 114.3                               | 57.3               | 0.7                                 | 0.7                |
|      |         | C         | 82.2                                     |                                     |                    |                                     |                    |
|      | 8B      | A         | 398.2                                    |                                     |                    |                                     |                    |
|      |         | B         | 33.2                                     | 183.2                               | 191.0              | 0.5                                 | 0.4                |

C 118.2

**Table S7.** Vie estuary. Foraminiferal density standardised for 50 cm<sup>3</sup>. For all stations. Data are presented for the three replicates.

| Station | Replicate | 0-1 cm total forams / 50 cm <sup>3</sup> | 0-1 cm average / 50 cm <sup>3</sup> | standard deviation | 0-1 cm average / 50 cm <sup>3</sup> | standard deviation |
|---------|-----------|------------------------------------------|-------------------------------------|--------------------|-------------------------------------|--------------------|
| 3       | A         | 434.0                                    |                                     |                    |                                     |                    |
|         | B         | 591.6                                    | 598.1                               | 167.3              | 41.0                                | 44.1               |
|         | C         | 768.5                                    |                                     |                    |                                     |                    |
| 4       | A         | 431.3                                    |                                     |                    |                                     |                    |
|         | B         | 1025.6                                   | 623.9                               | 348.0              | 36.9                                | 37.6               |
|         | C         | 414.7                                    |                                     |                    |                                     |                    |
| 5       | A         | 184.5                                    |                                     |                    |                                     |                    |
|         | B         | 89.8                                     | 169.6                               | 73.4               | 34.8                                | 26.1               |
|         | C         | 234.3                                    |                                     |                    |                                     |                    |
| 6       | A         | 427.1                                    |                                     |                    |                                     |                    |
|         | B         | 667.2                                    | 628.3                               | 184.9              | 23.3                                | 15.5               |
|         | C         | 790.6                                    |                                     |                    |                                     |                    |
| 7A      | A         | 1721.6                                   |                                     |                    |                                     |                    |
|         | B         | 2095.5                                   | 1744.2                              | 340.6              | 0.0                                 | 0.0                |
|         | C         | 1415.4                                   |                                     |                    |                                     |                    |
| 7B      | A         | 1152.1                                   |                                     |                    |                                     |                    |
|         | B         | 934.4                                    | 1283.4                              | 430.0              | 3.7                                 | 3.2                |
|         | C         | 1763.8                                   |                                     |                    |                                     |                    |
| 7C      | A         | 981.4                                    |                                     |                    |                                     |                    |
|         | B         | 1036.7                                   | 906.1                               | 180.4              | 38.1                                | 22.9               |
|         | C         | 700.3                                    |                                     |                    |                                     |                    |
| 8B      | A         | 937.2                                    |                                     |                    |                                     |                    |
|         | B         | 1150.0                                   | 1079.1                              | 122.9              | 84.8                                | 37.7               |
|         | C         | 1150.0                                   |                                     |                    |                                     |                    |
| 8A      | A         | 1981.5                                   |                                     |                    |                                     |                    |
|         | B         | 1515.0                                   | 1799.5                              | 249.6              | 0.0                                 | 0.0                |
|         | C         | 1902.0                                   |                                     |                    |                                     |                    |
| 9       | A         | 591.6                                    |                                     |                    |                                     |                    |
|         | B         | 975.9                                    | 889.3                               | 265.2              | 37.8                                | 28.0               |
|         | C         | 1100.3                                   |                                     |                    |                                     |                    |
| 10B     | A         | 239.8                                    |                                     |                    |                                     |                    |
|         | B         | 163.1                                    | 202.5                               | 38.4               | 9.7                                 | 6.0                |
|         | C         | 204.6                                    |                                     |                    |                                     |                    |
| 10A     | A         | 1094.7                                   |                                     |                    |                                     |                    |
|         | B         | 919.2                                    | 883.3                               | 231.6              | 0.2                                 | 0.4                |
|         | C         | 635.8                                    |                                     |                    |                                     |                    |

**Table S8.** Auray estuary. Relative frequencies of all major species (at least 1.0% for the average of the three replicates at one of the stations). Average values are given for the relative frequencies in the three replicates.

| Station | <i>Acostata mariei</i> | <i>Ammobaculites agglutinans</i> | <i>Ammotium salsum</i> | <i>Eggerelloides scaber</i> | <i>Morulaepecta bulbosa</i> | <i>Trochammina inflata</i> | <i>Milammina fusca</i> | <i>Quinqueloculina oblonga</i> | <i>Ammonia tepida</i> group | <i>Aubignyna perlucida</i> | <i>Elphidium decipiens</i> | <i>Elphidium margaritaceum</i> | <i>Elphidium oceanense</i> | <i>Elphidium selseyense</i> | <i>Haynesina depressula</i> | <i>Haynesina germanica</i> | Others |
|---------|------------------------|----------------------------------|------------------------|-----------------------------|-----------------------------|----------------------------|------------------------|--------------------------------|-----------------------------|----------------------------|----------------------------|--------------------------------|----------------------------|-----------------------------|-----------------------------|----------------------------|--------|
| 1A      | 0.0                    | 0.0                              | 0.0                    | 0.7                         | 0.0                         | 0.1                        | 0.0                    | 0.3                            | 11.2                        | 0.0                        | 0.2                        | 2.4                            | 2.8                        | 0.5                         | 0.0                         | 81.6                       | 0.2    |
| 1B      | 0.0                    | 0.0                              | 0.0                    | 2.0                         | 0.0                         | 0.0                        | 0.0                    | 4.8                            | 13.2                        | 0.0                        | 0.6                        | 9.4                            | 14.8                       | 1.3                         | 0.5                         | 53.0                       | 0.4    |
| 1C      | 0.0                    | 0.2                              | 0.0                    | 3.0                         | 0.1                         | 0.0                        | 0.2                    | 6.3                            | 10.8                        | 0.0                        | 1.0                        | 17.8                           | 9.9                        | 0.4                         | 3.3                         | 46.1                       | 1.0    |
| 2A      | 0.0                    | 2.1                              | 0.0                    | 0.0                         | 0.0                         | 0.0                        | 0.0                    | 0.0                            | 2.1                         | 0.0                        | 0.0                        | 0.0                            | 0.0                        | 0.0                         | 0.0                         | 95.8                       | 0.0    |
| 2B      | 2.0                    | 1.0                              | 0.3                    | 0.0                         | 1.6                         | 0.0                        | 0.0                    | 0.3                            | 2.5                         | 1.3                        | 0.0                        | 0.0                            | 0.0                        | 0.0                         | 0.3                         | 90.1                       | 0.6    |
| 2C      | 0.0                    | 0.0                              | 0.0                    | 0.0                         | 0.0                         | 0.0                        | 0.0                    | 0.5                            | 16.1                        | 1.1                        | 0.2                        | 0.9                            | 5.8                        | 0.1                         | 0.0                         | 75.1                       | 0.1    |
| 4A      | 0.0                    | 4.1                              | 4.6                    | 0.4                         | 0.0                         | 0.0                        | 0.0                    | 2.8                            | 3.6                         | 0.0                        | 0.1                        | 0.2                            | 0.5                        | 0.0                         | 0.0                         | 83.6                       | 0.1    |
| 4B      | 0.1                    | 2.4                              | 0.2                    | 0.4                         | 0.0                         | 0.0                        | 0.1                    | 0.7                            | 13.1                        | 0.0                        | 0.0                        | 0.1                            | 0.6                        | 0.0                         | 0.0                         | 82.2                       | 0.1    |
| 5A      | 0.0                    | 0.2                              | 0.1                    | 0.1                         | 0.0                         | 0.0                        | 0.0                    | 0.7                            | 1.0                         | 0.0                        | 0.0                        | 0.0                            | 0.0                        | 0.0                         | 0.0                         | 98.0                       | 0.0    |
| 5B      | 0.0                    | 5.0                              | 1.0                    | 0.5                         | 0.0                         | 0.1                        | 0.0                    | 2.2                            | 11.9                        | 0.0                        | 0.0                        | 0.2                            | 0.7                        | 0.7                         | 0.0                         | 77.1                       | 0.6    |
| 6A      | 0.0                    | 0.8                              | 1.2                    | 0.0                         | 0.0                         | 0.0                        | 0.0                    | 0.3                            | 2.8                         | 0.7                        | 0.0                        | 0.0                            | 0.1                        | 0.1                         | 0.0                         | 94.1                       | 0.0    |
| 6B      | 0.0                    | 3.4                              | 1.9                    | 0.7                         | 0.0                         | 0.0                        | 0.0                    | 0.7                            | 10.4                        | 0.2                        | 0.0                        | 0.2                            | 0.5                        | 0.3                         | 0.1                         | 81.3                       | 0.3    |
| 7       | 0.0                    | 0.0                              | 4.3                    | 0.0                         | 0.0                         | 0.0                        | 0.0                    | 0.0                            | 12.4                        | 0.0                        | 0.0                        | 0.3                            | 2.7                        | 0.0                         | 0.0                         | 79.7                       | 0.5    |
| 8A      | 0.1                    | 2.8                              | 23.3                   | 0.0                         | 0.0                         | 0.4                        | 1.1                    | 0.0                            | 17.8                        | 0.0                        | 0.0                        | 0.0                            | 3.5                        | 0.0                         | 0.0                         | 50.0                       | 0.9    |
| 8B      | 0.3                    | 5.9                              | 81.1                   | 0.0                         | 0.0                         | 7.9                        | 1.9                    | 0.0                            | 0.1                         | 0.0                        | 0.0                        | 0.0                            | 0.0                        | 0.0                         | 0.0                         | 2.5                        | 0.2    |

**Table S9.** Vie estuary. Relative frequencies of all major species (at least 1.0% for the average of the three replicates at one of the stations). Average values are given for the relative frequencies in the three replicates.

| Station | <i>Quinqueloculina jugosa</i> | <i>Quinqueloculina oblonga</i> | <i>Ammonia tepida</i> group | <i>Elphidium magellanicum</i> | <i>Elphidium oceanense</i> | <i>Elphidium selseyense</i> | <i>Elphidium williamsoni</i> | <i>Haynesina germanica</i> | Others |
|---------|-------------------------------|--------------------------------|-----------------------------|-------------------------------|----------------------------|-----------------------------|------------------------------|----------------------------|--------|
| 3       | 2.3                           | 1.5                            | 4.0                         | 0.6                           | 0.3                        | 50.2                        | 1.2                          | 38.7                       | 1.2    |
| 4       | 5.7                           | 4.9                            | 3.7                         | 1.7                           | 0.3                        | 68.5                        | 0.2                          | 14.1                       | 1.2    |
| 5       | 1.2                           | 1.8                            | 1.5                         | 0.3                           | 0.0                        | 66.2                        | 0.1                          | 28.4                       | 0.6    |
| 6       | 0.8                           | 0.7                            | 6.2                         | 0.1                           | 0.1                        | 9.9                         | 0.1                          | 81.7                       | 0.5    |
| 7A      | 0.3                           | 0.3                            | 6.2                         | 0.0                           | 0.7                        | 0.1                         | 0.2                          | 92.2                       | 0.1    |
| 7B      | 1.8                           | 0.3                            | 5.7                         | 0.0                           | 0.1                        | 1.7                         | 0.1                          | 90.0                       | 0.0    |
| 7C      | 2.6                           | 2.1                            | 16.3                        | 0.1                           | 0.5                        | 8.5                         | 0.3                          | 69.5                       | 0.3    |
| 8B      | 5.1                           | 1.6                            | 23.0                        | 0.0                           | 1.5                        | 12.2                        | 0.0                          | 56.4                       | 0.0    |
| 8A      | 1.2                           | 1.8                            | 11.7                        | 0.0                           | 2.7                        | 0.0                         | 0.3                          | 82.3                       | 0.2    |

|     |     |     |      |     |     |     |     |      |     |
|-----|-----|-----|------|-----|-----|-----|-----|------|-----|
| 9   | 5.8 | 1.3 | 42.4 | 0.0 | 2.5 | 5.5 | 0.2 | 42.3 | 0.0 |
| 10B | 7.3 | 1.6 | 49.8 | 0.0 | 0.9 | 0.2 | 0.2 | 39.7 | 0.0 |
| 10A | 0.8 | 0.2 | 35.2 | 0.0 | 3.2 | 0.0 | 0.2 | 60.4 | 0.3 |

**Table S10.** Marine Influence Index (MII) values for the studied stations.

| Auray | Station | MII  | Vie | Station | MII  |
|-------|---------|------|-----|---------|------|
|       | 1A      | 0.48 |     | 3       | 0.69 |
|       | 1B      | 0.67 |     | 4       | 0.71 |
|       | 1C      | 0.65 |     | 5       | 0.58 |
|       | 2A      | 0.08 |     | 6       | 0.72 |
|       | 2B      | 0.17 |     | 7A      | 0.19 |
|       | 2C      | 0.57 |     | 7B      | 0.31 |
|       | 4A      | 0.25 |     | 7C      | 0.65 |
|       | 4B      | 0.43 |     | 8A      | 0.26 |
|       | 5A      | 0.28 |     | 8B      | 0.64 |
|       | 5B      | 0.37 |     | 9       | 0.58 |
|       | 6A      | 0.21 |     | 10A     | 0.11 |
|       | 6B      | 0.28 |     | 10B     | 0.36 |
|       | 7       | 0.24 |     |         |      |
|       | 8A      | 0.13 |     |         |      |
|       | 8B      | 0.17 |     |         |      |

**Table S11.** Eigenvalues, % of variance and species scores of the PCA based on relative frequencies of all major species (at least 1.0% for the average of the three replica at one of the stations).

| Axis                             | PCA1         | PCA2         | PCA3         |
|----------------------------------|--------------|--------------|--------------|
| Eigenvalue                       | 890.4        | 356.2        | 236.0        |
| % of variance explained          | 58.2%        | 23.3%        | 15.4%        |
| <i>Acostata mariei</i>           | 0.02         | -0.01        | -0.03        |
| <i>Ammobaculites agglutinans</i> | -0.03        | -0.32        | -0.29        |
| <i>Ammonia tepida</i> group      | -0.63        | <b>-1.38</b> | <b>4.44</b>  |
| <i>Ammotium salsum</i>           | <b>-2.64</b> | <b>-4.16</b> | <b>-2.92</b> |
| <i>Aubignyna perlucida</i>       | 0.03         | 0.00         | -0.01        |
| <i>Eggerelloides scaber</i>      | 0.00         | -0.02        | 0.03         |
| <i>Elphidium decipiens</i>       | 0.00         | -0.01        | 0.01         |
| <i>Elphidium magellanicum</i>    | -0.08        | 0.08         | -0.02        |
| <i>Elphidium margaritaceum</i>   | -0.11        | -0.12        | 0.17         |
| <i>Elphidium oceanense</i>       | -0.07        | -0.24        | 0.41         |
| <i>Elphidium selseyense</i>      | <b>-4.77</b> | <b>5.02</b>  | <b>-0.97</b> |
| <i>Elphidium williamsoni</i>     | -0.03        | 0.02         | 0.01         |
| <i>Haynesina depressula</i>      | -0.02        | -0.02        | 0.02         |
| <i>Haynesina germanica</i>       | <b>9.26</b>  | <b>1.30</b>  | <b>-1.01</b> |
| <i>Miliammina fusca</i>          | -0.07        | -0.11        | -0.07        |
| <i>Morulaepecta bulbosa</i>      | 0.02         | 0.00         | -0.01        |
| <i>Quinqueloculina jugosa</i>    | -0.35        | 0.14         | 0.43         |
| <i>Quinqueloculina oblonga</i>   | -0.20        | 0.15         | 0.09         |
| <i>Trochammina inflata</i>       | -0.26        | -0.37        | -0.28        |

**Table S12.** Results of Spearman correlation test between all dominant species (>5%) and environmental parameters. Values correspond to R, *ns* means that the relation is not significant, \* that the p.value is < 0.05 and \*\* that the p.value is < 0.01. Blue indicates negative correlations, red positive correlations and grey non-significant correlations.

|                                  |             | MII      | Emergence time | Normalised distance to sea | < 63um   | C <sub>org</sub> (%) |
|----------------------------------|-------------|----------|----------------|----------------------------|----------|----------------------|
| <i>Ammobaculites agglutinans</i> | 2 estuaries | x        | x              | x                          | x        | x                    |
|                                  | Auray       | −0.47 ns | 0.01 ns        | −0.53 *                    | −0.21 ns | −0.11 ns             |
|                                  | Vie         | x        | x              | x                          | x        | x                    |
| <i>Ammonia tepida</i> group      | 2 estuaries | 0.17 ns  | −0.32 ns       | −0.15 ns                   | −0.1 ns  | 0.09 ns              |
|                                  | Auray       | 0.45 ns  | −0.39 ns       | 0.12 ns                    | −0.05 ns | 0.34 ns              |
|                                  | Vie         | −0.38 ns | −0.05 ns       | −0.93 **                   | 0.35 ns  | −0.68 *              |
| <i>Ammotium salsum</i>           | 2 estuaries | x        | x              | x                          | x        | x                    |
|                                  | Auray       | −0.59 *  | −0.06 ns       | −0.88 **                   | −0.03 ns | 0.1 ns               |
|                                  | Vie         | x        | x              | x                          | x        | x                    |
| <i>Elphidium margaritaceum</i>   | 2 estuaries | x        | x              | x                          | x        | x                    |
|                                  | Auray       | 0.83 **  | −0.44 ns       | 0.58 *                     | −0.33 ns | −0.27 ns             |
|                                  | Vie         | x        | x              | x                          | x        | x                    |
| <i>Elphidium oceanense</i>       | 2 estuaries | 0.16 ns  | −0.21 ns       | −0.05 ns                   | −0.13 ns | −0.06 ns             |
|                                  | Auray       | 0.68 **  | −0.46 ns       | 0.36 ns                    | −0.33 ns | 0.01 ns              |
|                                  | Vie         | −0.47 ns | 0.12 ns        | −0.79 **                   | 0.25 ns  | −0.55 ns             |
| <i>Elphidium selseyense</i>      | 2 estuaries | x        | x              | x                          | x        | x                    |
|                                  | Auray       | x        | x              | x                          | x        | x                    |
|                                  | Vie         | 0.81 **  | −0.61 *        | 0.75 *                     | −0.74 *  | 0.84 **              |
| <i>Haynesina germanica</i>       | 2 estuaries | −0.43 *  | 0.47 *         | −0.17 ns                   | 0.17 ns  | 0.40 *               |
|                                  | Auray       | −0.31 ns | 0.68 *         | 0.1 ns                     | 0.49 ns  | 0.23 ns              |
|                                  | Vie         | −0.41 ns | 0.27 ns        | −0.25 ns                   | 0.24 ns  | −0.54 ns             |
| <i>Quinqueloculina jugosa</i>    | 2 estuaries | x        | x              | x                          | x        | x                    |
|                                  | Auray       | x        | x              | x                          | x        | x                    |
|                                  | Vie         | 0.34 ns  | −0.54 ns       | −0.19 ns                   | −0.11 ns | −0.06 ns             |
| <i>Quinqueloculina oblonga</i>   | 2 estuaries | 0.73 **  | −0.38 *        | 0.47 *                     | −0.23 ns | −0.47 *              |
|                                  | Auray       | 0.75 **  | −0.3 ns        | 0.5 ns                     | −0.4 ns  | −0.36 ns             |
|                                  | Vie         | 0.48 ns  | −0.38 ns       | 0.34 ns                    | −0.33 ns | 0.33 ns              |

**Table S13.** Ecological characteristics of the dominant species of our dataset.

|                                |                                                                                                                                                                                                                                                                                                                                                                                                                                                                 |
|--------------------------------|-----------------------------------------------------------------------------------------------------------------------------------------------------------------------------------------------------------------------------------------------------------------------------------------------------------------------------------------------------------------------------------------------------------------------------------------------------------------|
| <i>Ammonia tepida</i>          | <i>Ammonia tepida</i> is considered as one of the dominant species in intertidal sediments [98]. It is characteristic of lagoons, estuaries and inner shelves [66] and known to be tolerant to all kinds of stressed conditions (e.g. low salinity, organic input, hypoxic conditions) [84,99]. <i>A. tepida</i> is considered as 2 <sup>nd</sup> order opportunist by Jorissen et al. [19], and as a 3 <sup>rd</sup> order opportunist by Bouchet et al. [25]. |
| <i>Haynesina germanica</i>     | <i>Haynesina germanica</i> is a major species in estuarine areas and is considered as extremely euryhaline [66,82]. It is present in polluted [35,90] as well as unpolluted estuaries [27,81]. <i>H. germanica</i> is considered as a 3 <sup>rd</sup> order opportunist by Jorissen et al. [19], and Bouchet et al. [25].                                                                                                                                       |
| <i>Elphidium margaritaceum</i> | <i>Elphidium margaritaceum</i> is dominant in estuary mouths, nearshore areas and marine areas [66,83,94]. It is considered as a sensitive species by Bouchet et al., [25].                                                                                                                                                                                                                                                                                     |
| <i>Elphidium oceanense</i>     | <i>Elphidium oceanense</i> is a brackish to marine species, commonly found in estuaries, estuary mouths and nearshore areas [66]. This species is considered as a 3 <sup>rd</sup> order opportunist by Jorissen et al. [19] and Bouchet et al. [25].                                                                                                                                                                                                            |

|                                  |                                                                                                                                                                                                                                                                                                                                                                                                                                                                                                |
|----------------------------------|------------------------------------------------------------------------------------------------------------------------------------------------------------------------------------------------------------------------------------------------------------------------------------------------------------------------------------------------------------------------------------------------------------------------------------------------------------------------------------------------|
| <i>Elphidium selseyense</i>      | <i>Elphidium selseyense</i> is an inner shelf species, tolerant of brackish conditions [33,66,82]. This species is considered as a sensitive species by Bouchet et al., [25].                                                                                                                                                                                                                                                                                                                  |
| <i>Quinqueloculina oblonga</i>   | <i>Quinqueloculina oblonga</i> is commonly found in estuary mouths and nearshore areas [27,66]. This species is considered as a 3 <sup>rd</sup> order opportunist by Jorissen et al [19] and as a 1 <sup>st</sup> order opportunist by Bouchet et al [25].                                                                                                                                                                                                                                     |
| <i>Quinqueloculina jugosa</i>    | <i>Q. jugosa</i> is considered as a 1 <sup>st</sup> order opportunist by Bouchet et al [25].                                                                                                                                                                                                                                                                                                                                                                                                   |
| <i>Ammotium salsum</i>           | <i>Ammotium salsum</i> is widespread in brackish environments [100,101] and has a preference for environments with a salinity comprised between 10 and 20 [85]. It is especially common in salt marshes [28,69]. <i>A. salsum</i> was found in environments subjected to stressful conditions (e.g., high temperature variations, low oxygen in sediment, elevated trace metal) and considered as a very robust species [95]. It favours substrates rich in organic matter [85].               |
| <i>Ammobaculites agglutinans</i> | <i>Ammobaculites agglutinans</i> is commonly found in inner part of estuaries and salt marshes [102] and tolerates a wide range of temperature and salinity [85]. It favours substrates rich in organic matter [85].                                                                                                                                                                                                                                                                           |
| <i>Trochammina inflata</i>       | <i>Trochammina inflata</i> is predominant in brackish tidal marshes [31,66,83]. It tolerates a high environmental variability, including periods of low oxygen availability [66]. <i>T. inflata</i> , like others salt marsh species (e.g., <i>A. salsum</i> and <i>A. agglutinans</i> ), shows a strong correlation with high organic carbon levels, even in completely natural conditions [32]. For this reason, this species is not assigned to an ecological group by Bouchet et al. [25]. |
